# Supplementary material for: Gender Differences of the Effect of Vaccination on Perceptions of COVID-19 and Mental Health in Japan
Source: MDPI journal article supplement (doi:10.3390/vaccines11040822), 2023-04-10
Supplement: s1 [file s1]

**Table S1.** FE model: Dependent variables are perceptions of COVID-19 and mental health. Male sample. (Alternative specification).

|                         | (1)<br><i>PROB_<br/>COVID19</i> | (2)<br><i>SEVER_<br/>COVID19</i> | (3)<br><i>HAPPY</i> | (4)<br><i>FEAR</i> | (5)<br><i>ANXIETY</i> | (6)<br><i>ANGER</i> |
|-------------------------|---------------------------------|----------------------------------|---------------------|--------------------|-----------------------|---------------------|
| <i>VACCINE FIRST</i>    | −1.876 ***                      | −0.015                           | 0.0003              | 0.003              | 0.008                 | 0.010               |
| <i>VACCINE SECOND_1</i> | −4.23 ***                       | −0.167 ***                       | −0.005              | −0.034             | −0.042                | 0.014               |
| Adj R <sup>2</sup>      | 0.57                            | 0.65                             | 0.77                | 0.56               | 0.57                  | 0.57                |
| Obs.                    | 27,316                          | 27,316                           | 27,316              | 27,316             | 27,316                | 27,316              |

**Note:** The set of control variables used in Table 4 is included, although the results are not reported.

\*\*\* $p < 0.01$ , \*\* $p < 0.05$ , \* $p < 0.10$ .

**Table S2.** FE model: Dependent variables are perceptions of COVID-19 and mental health. Female sample. (Alternative specification).

|                         | (1)<br><i>PROB_<br/>COVID19</i> | (2)<br><i>SEVER_<br/>COVID19</i> | (3)<br><i>HAPPY</i> | (4)<br><i>FEAR</i> | (5)<br><i>ANXIETY</i> | (6)<br><i>ANGER</i> |
|-------------------------|---------------------------------|----------------------------------|---------------------|--------------------|-----------------------|---------------------|
| <i>VACCINE FIRST</i>    | −0.624                          | −0.074 **                        | 0.049               | −0.084 ***         | −0.059 *              | −0.029              |
| <i>VACCINE SECOND_1</i> | −5.151 ***                      | −0.174 ***                       | 0.127 **            | −0.134 ***         | −0.085 ***            | −0.021              |
| Adj R <sup>2</sup>      | 0.56                            | 0.68                             | 0.73                | 0.54               | 0.55                  | 0.48                |
| Obs.                    | 26,691                          | 26,691                           | 26,691              | 26,691             | 26,691                | 26,691              |

\*\*\* $p < 0.01$ , \*\* $p < 0.05$ , \* $p < 0.10$ .

**Table S3.** FE model: Dependent variables are perceptions of COVID-19 and mental health. Simpler model where VACCINE is replaced by VACCINE FIRST and VACCINE SECOND\_1.

|                                        | (1)<br><i>PROB_<br/>COVID19</i> | (2)<br><i>SEVER_<br/>COVID19</i> | (3)<br><i>HAPPY</i> | (4)<br><i>FEAR</i> | (5)<br><i>ANXIETY</i> | (6)<br><i>ANGER</i> |
|----------------------------------------|---------------------------------|----------------------------------|---------------------|--------------------|-----------------------|---------------------|
| <i>Full sample of (Table 4)</i>        |                                 |                                  |                     |                    |                       |                     |
| <i>VACCINE</i>                         | −3.273 ***                      | −0.118 ***                       | 0.044 **            | −0.066 ***         | −0.047 **             | −0.006              |
| <i>Sub-sample of males (Table 7)</i>   |                                 |                                  |                     |                    |                       |                     |
| <i>VACCINE</i>                         | −3.274 ***                      | −0.105 ***                       | −0.003              | −0.019             | −0.021                | −0.012              |
| <i>Sub-sample of females (Table 8)</i> |                                 |                                  |                     |                    |                       |                     |
| <i>VACCINE</i>                         | −3.290 ***                      | −0.133 ***                       | 0.094 ***           | −0.114 ***         | −0.074 ***            | −0.024              |

\*\*\* $p < 0.01$ , \*\* $p < 0.05$ , \* $p < 0.10$ .
